# Supplementary material for: Heart Transplantation in Mustard Patients Bridged With Continuous Flow Systemic Ventricular Assist Device - A Case Report and Review of Literature
Source: Frontiers journal article supplement (doi:10.3389/fcvm.2021.651496), 2021-04-20
Supplement: Table_1.DOCX [file Table_1.DOCX]

| 14 months of age  26 years old  32 years old  34 years old (7/2/2014) | - Underwent Mustard operation for correction of D-TGA. - Heart failure symptoms started, cardiac MRI showing RVEF 55%, RVEDV 221 ml, and CO 4.6 L/min. - Repeat cardiac MRI showing RVEF 41.9%, RVEDV 423.6 ml, and CO 3.9 L/min. - Worsening shortness of breath with exertion. Right heart catheterization showing MPAP 52 mmHg, PVR 5.5 WU. |
| --- | --- |
| 34 years old (at presentation)  34 years old (11/3/2014)  36 years old (5/27/2016)  37 years old (2/1/2017)  38 years old till present | - Patient presented in cardiogenic shock requiring inotropic support. - HeartWare HVAD® was implanted for systemic right ventricular support. - He was successfully discharged on post-operative day 22. - Symptoms improved; he was able to walk more than one mile daily. - Repeat catheterization showed complete normalization of PVR at 1.5 WU, MPAP of 27 mmHg, and a CI of 3 L/min/m2. - Symptoms further improved. - Repeat catheterization showed complete normalization of PVR at 1.5 WU, MPAP of 14 mmHg, and a CI of 2.2 L/min/m2. - Patient was listed for cardiac transplantation.      - A suitable donor was identified. - Patient underwent VAD extraction and orthotopic heart transplantation. - Discharged on post-operative day 25. - Symptoms continued to improve (New York Heart Association class I) and the patient’s quality of life improved given that he is more active. |
| *D-TGA: D-transposition of the great arteries; MRI: Magnetic Resonance Imaging; RVEF: Right Ventricular Ejection Fraction; RVEDV: Right Ventricular End Diastolic Volume; CO: Cardiac Output; MPAP: Mean Pulmonary Artery Pressure; PVR: Pulmonary Vascular Resistance; CI: Cardiac Index; VAD: Ventricular Assist Device* | |
