# Supplementary material for: Heart Transplantation in Mustard Patients Bridged With Continuous Flow Systemic Ventricular Assist Device - A Case Report and Review of Literature
Source: Frontiers journal article supplement (doi:10.3389/fcvm.2021.651496), 2021-04-20
Supplement: Table_2.XLSX [file Table_2.XLSX]

## Sheet: Sheet1
D-TGA	Author, publication year & reference number	Patient profile (age in years at VAD implantation, sex)	Device type	Time on device (months)	Total time on heart transplant waitlist (months)	Indication for VAD	pulmonary data	Pulmonary Hypertension reversal + duration	mean PAP before VAD	mean PAP after VAD	PVR before VAD	PVR after VAD	Stroke	Thrombosis	drive line infection	OHT outcomes	Reference
	Maly J et al., 2015 [4]	29, male	HeartMate II	11 months	11 months	cardiogenic shock	yes	N/A	14	NR	1.2	NR	No	No	Yes	Alive, post-operative f/u	Maly J, Netuka I, Besik J, Dorazilova Z, Pirk J, Szarszoi O. Bridge to transplantation with long-term mechanical assist device in adults after the Mustard procedure. J Heart Lung Transplant. 2015 Sep;34(9):1177-81. doi:10.1016/j.healun.2015.03.025. Epub 2015 Mar 30. PMID: 26023034.
		31, male		7 months	7 months	BTT	yes	N/A	32	NR	1.7	NR	No	No	Yes	Alive, post-operative f/u
		33, male		12 months	12 months	BTT	yes	N/A	37	NR	2.7	NR	No	No	No	Alive, post-operative f/u
	Sugiura et al., 2018 [5]	34, male	HeartMate II	72 months	84 months	BTT	no	-	-	-	-	-	No	No	Yes	Alive, unspecified f/u	Sugiura T, Kurihara C, Kawabori M, Critsinelis AC, Civitello AB, Morgan JA, Frazier OH. Continuous-Flow Left Ventricular Assist Device Therapy in Adults with Transposition of the Great Vessels. Ann Thorac Cardiovasc Surg. 2018 Aug 10. doi: 10.5761/atcs.cr.18-00021. Epub ahead of print. PMID: 30101823.
	Stewart AS et al., 2002 [6]	15, female	HeartMate I	3 months	3 months	cardiogenic shock	yes	-	NR	-	8	-	No	No	No	Alive, 3 years	Stewart AS, Gorman RC, Pocchetino A, Rosengard BR, Acker MA. Left ventricular assist device for right side assistance in patients with transposition. Ann Thorac Surg. 2002 Sep;74(3):912-4. doi:10.1016/s0003-4975(02)03671-8. PMID: 12238863.
	Michel E et al., 2018 [7]	50, male	HeartMate II	7.5 months	NR	BTT	yes	No - 7.5 months	59	45	3.9	3.8	No	No	No	Alive, post-operative f/u	Michel E, Orozco Hernandez E, Enter D, Monge M, Nakano J, Rich J, Anderson A, Backer C, McCarthy P, Pham D. Bridge to Transplantation With Long-Term Mechanical Assist Devices in Adults With Transposition of the Great Arteries. Artif Organs. 2019 Jan;43(1):90-96. doi: 10.1111/aor.13347. Epub 2018 Oct 28. PMID: 30129258.
		40, male	HVAD	15 months		severe pHTN then BTT	yes	No - 15 months	76	30	8.9	3.9	No	No	No	Alive, post-operative f/u
	Stokes MB et al., 2015 [8]	47, male	HVAD	13 months	48 months	severe pHTN	yes	Yes - 2 months	47	34	3.2	1.7	NR	NR	NR	Alive, 1 month f/u	Stokes MB, Saxena P, McGiffin DC, Marasco S, Leet AS, Bergin P. Successful Bridge to Orthotopic Cardiac Transplantation with Implantation of a HeartWare HVAD in Management of Systemic Right Ventricular Failure in a Patient with Transposition of the Great Arteries and Previous Atrial Switch Procedure. Heart Lung Circ. 2016 May;25(5):e69-71. doi: 10.1016/j.hlc.2015.11.006. Epub 2015 Dec 2. PMID: 26…
	Dakkak AR et al, 2014 [9]	41, female	HeartMate II	11 months	72 months	cardiogenic shock	yes	NR	68	NR	3.1	NR	NR	NR	NR	Alive, post-operative f/u	Dakkak AR, Sindermann JR, Dell'Aquila AM, Welp HA, Martens S, Scherer M. Implanting a Nonpulsatile Axial Flow Left Ventricular Assist Device as a Bridge to Transplant for Systemic Ventricular Failure After A Mustard Procedure. Exp Clin Transplant. 2015 Oct;13(5):485-7. doi: 10.6002/ect.2014.0043. Epub 2014 Sep 17. PMID: 25232871.
	George RS et al., 2007 [10]	17, male	HeartMate I	13 months	36 months	cardiogenic shock	no	-	-	-	-	-	NR	NR	NR	Alive, 4.5 years	George RS, Birks EJ, Radley-Smith RC, Khaghani A, Yacoub M. Bridge to transplantation with a left ventricular assist device for systemic ventricular failure after Mustard procedure. Ann Thorac Surg. 2007 Jan;83(1):306-8. doi: 10.1016/j.athoracsur.2006.03.119. PMID: 17184691.
	Arendt K et al., 2010 [11]	28, male	HeartMate II	21 months	NR	cardiogenic shock	yes	Yes - 11 months	NR	NR	16.5	2.7	NR	NR	Yes	Alive, 3 week f/u	Arendt K, Doll S, Mohr FW. Failing Mustard circulation with secondary pulmonary hypertension: mechanical assist device to achieve reverse pulmonary vascular remodelling for subsequent heart transplantation. Heart. 2010 Jul;96(14):1164. doi: 10.1136/hrt.2009.184580. Epub 2010 Apr 20. PMID: 20406764.
	Gyoten T et al., 2020 [12]	37, female	HVAD	30 months	NR	severe pHTN	yes	Yes - 30 months	54	20	6.9	2.8	No	No	Yes	Alive, 8 years	Takayuki Gyoten, Sebastian V Rojas, Henrik Fox, René Schramm, Kavous Hakim-Meibodi, Maria Ruiz-Cano, Jan F Gummert, Michiel Morshuis, Eugen Sandica, Mechanical circulatory support as a bridge to candidacy in adults with transposition of the great arteries and a systemic right ventricle, European Journal of Cardio-Thoracic Surgery, , ezaa373, https://doi.org/10.1093/ejcts/ezaa373
		37, female	HVAD	7 months	NR	severe pHTN	yes	Yes - 7 months	55	25	4.5	2.3	Yes	No	No	Died 3 days after HTx of multiple organ failure
